# Supplementary material for: Fabrication of Novel g-C3N4@Bi/Bi2O2CO3 Z-Scheme Heterojunction with Meliorated Light Absorption and Efficient Charge Separation for Superior Photocatalytic Performance
Source: MDPI journal article supplement (doi:10.3390/molecules27238336), 2022-11-29
Supplement: s1 [file s1]

## Supplementary Materials

# Fabrication of Novel g-C<sub>3</sub>N<sub>4</sub>@Bi/Bi<sub>2</sub>O<sub>2</sub>CO<sub>3</sub> Z-Scheme Heterojunction with Meliorated Light Absorption and Efficient Charge Separation for Superior Photocatalytic Performance

Hongxia Fan, Xiaohui Ma, Xinyang Li, Li Yang, Yongzhong Bian\*, Wenjun Li\*

Beijing Key Laboratory for Science and Application of Functional Molecular and Crystalline Materials, University of Science and Technology Beijing, Beijing 100083, China

## Figures

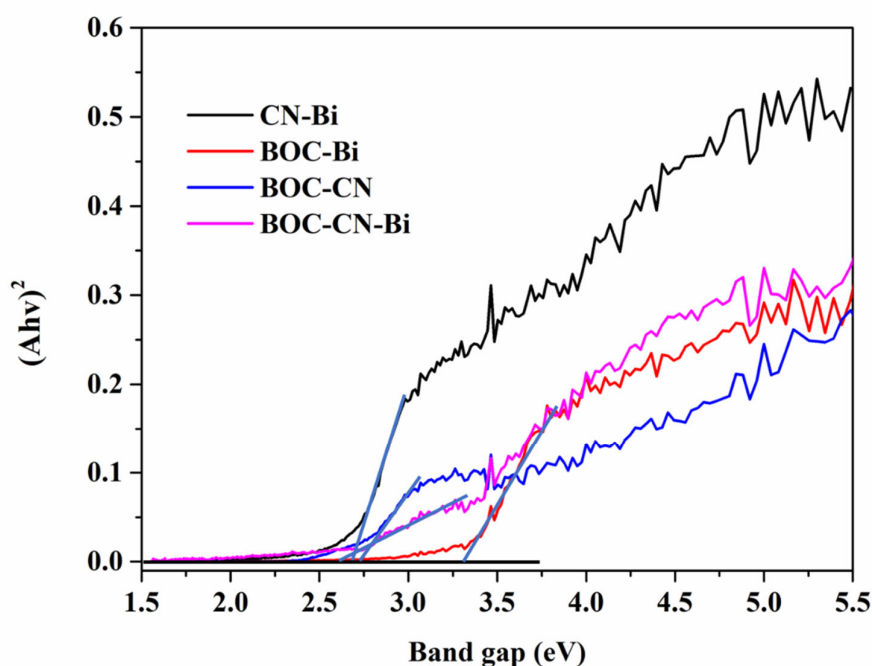

**Figure S1.** The band gaps of BOC-Bi, CN-Bi, BOC-CN, and BOC-CN-Bi.

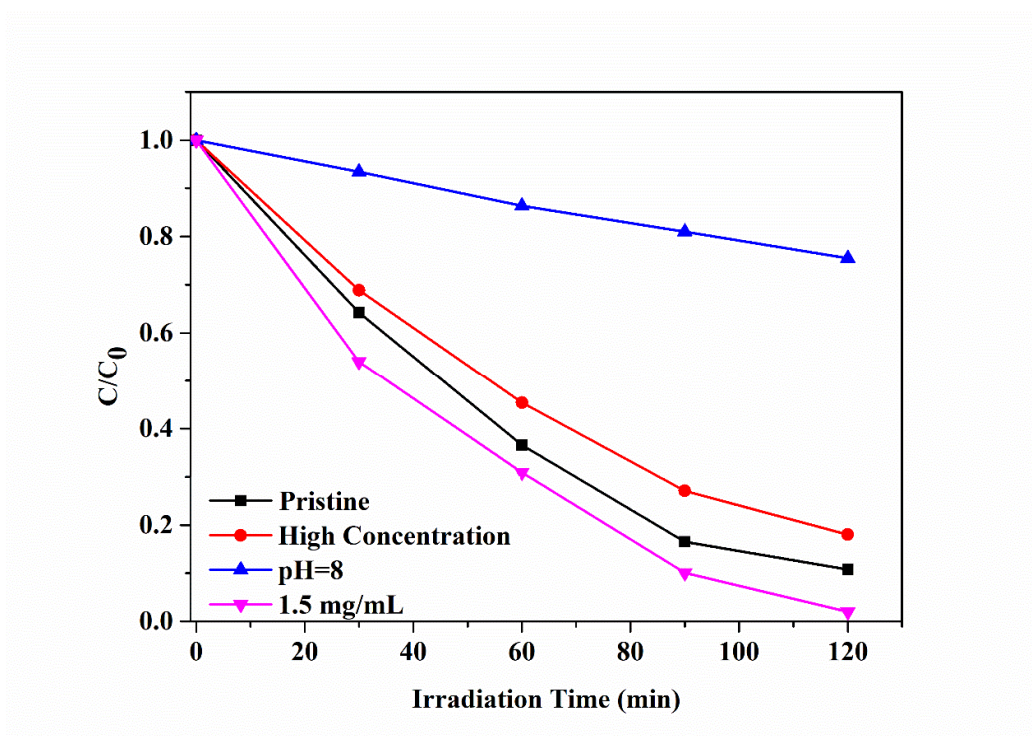

**Figure S2.** The photodegradation different organic pollutant of BOC-CN-Bi under different conditions.

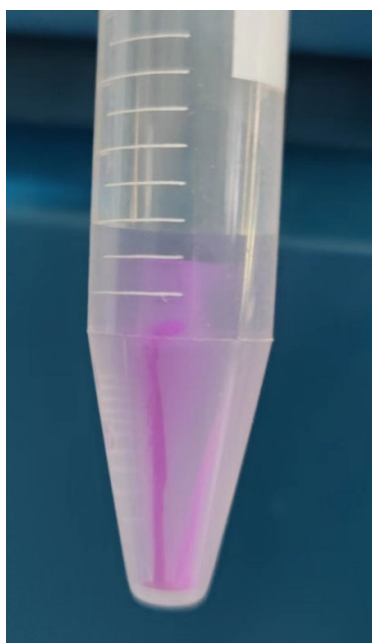

**Figure S3.** The color of the solution for BOC-CN-Bi after the dark at pH = 4.

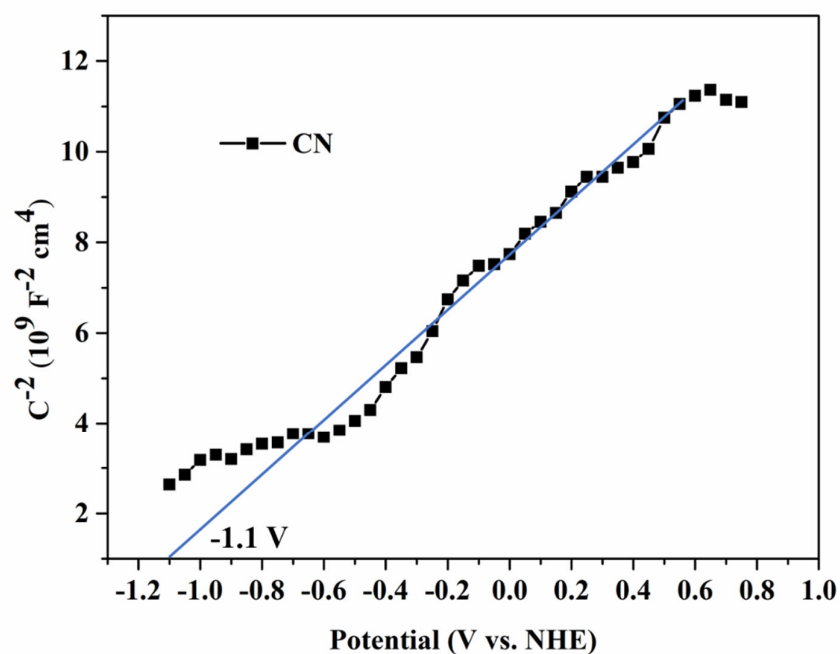

Figure S4. Mott-Schottky plots of CN.

Table S1. Element content of BOC-CN-Bi composites by EDS.

| Element | Weight percentage | Wt % Sigma | Atomic percent |
|---------|-------------------|------------|----------------|
| C       | 16.11             | 0.58       | 46.86          |
| N       | 1.41              | 0.72       | 3.53           |
| O       | 17.76             | 0.42       | 38.79          |
| Bi      | 64.72             | 0.78       | 10.82          |

Table S2. The Value of RhB adsorption for all samples.

|                         | BOC   | CN    | BOC-Bi | CN-Bi | BOC-CN | BOC-CN-Bi |
|-------------------------|-------|-------|--------|-------|--------|-----------|
| Value of RhB adsorption | 0.213 | 0.181 | 0.225  | 0.193 | 0.211  | 0.256     |
